# Supplementary material for: Stable Performance of Supported PdOx Catalyst on Mesoporous Silica-Alumina of Water Tolerance for Methane Combustion under Wet Conditions
Source: MDPI journal article supplement (doi:10.3390/catal11060670), 2021-05-24
Supplement: s1 [file s1]

# Supplementary Materials

## **Stable performance of supported PdO<sub>x</sub> catalyst on mesoporous silica-alumina of water tolerance for methane combustion under wet conditions**

Minseok Kim <sup>1,†</sup>, Suhyun Lim <sup>1,†</sup>, Chansong Kim <sup>2</sup>, Chae-Ho Shin <sup>2</sup>, Joon Hyun Baik <sup>3</sup>, and Young-Woong Suh <sup>1,4,\*</sup>

<sup>1</sup> Department of Chemical Engineering, Hanyang University, Seoul 04763, Republic of Korea

<sup>2</sup> Department of Chemical Engineering, Chungbuk National University, Cheongju 28644, Republic of Korea

<sup>3</sup> Department of Chemical and Biological Engineering, Sookmyung Women's University, Seoul 04310, South Korea

<sup>4</sup> Research Institute of Industrial Science, Hanyang University, Seoul 04763 Republic of Korea

Number of Pages: 10, Number of Figures: 8, Number of Tables: 1

---

\*Corresponding author. E-mail: ywsuh@hanyang.ac.kr; Phone: +82-2-2220-2329; ORCID: 0000-0002-2094-0724 (Y.-W. Suh)

<sup>†</sup>The authors contributed equally to this work.

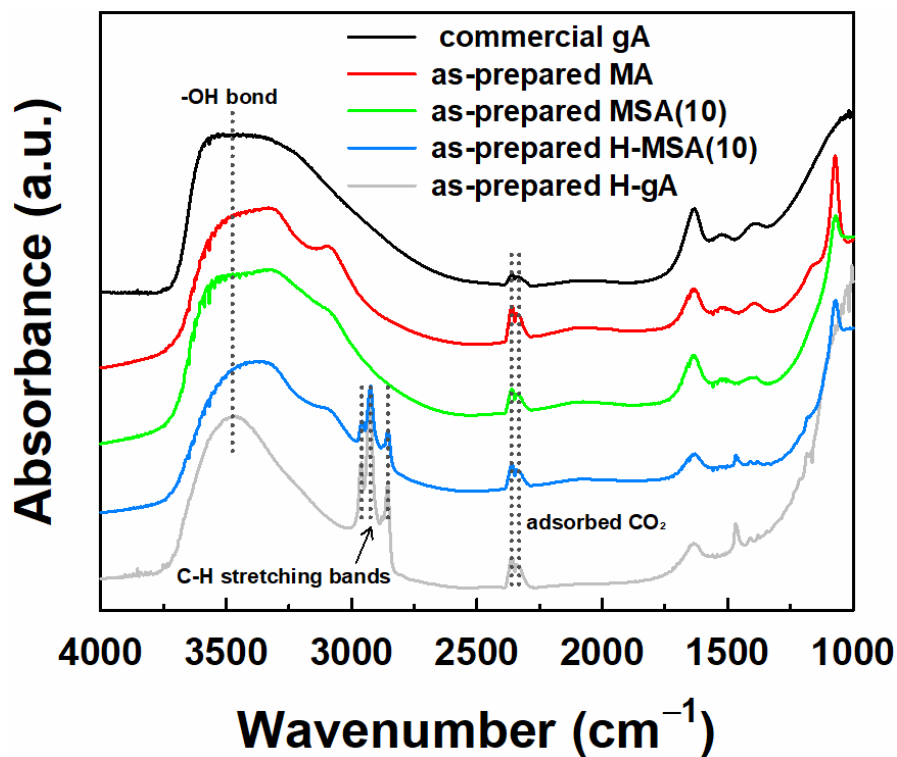

**Figure S1.** FT-IR spectra of the as-synthesized samples (H-MSA(10), MSA(10), MA and gA) and water-tolerant  $\gamma$ -alumina (H-gA).

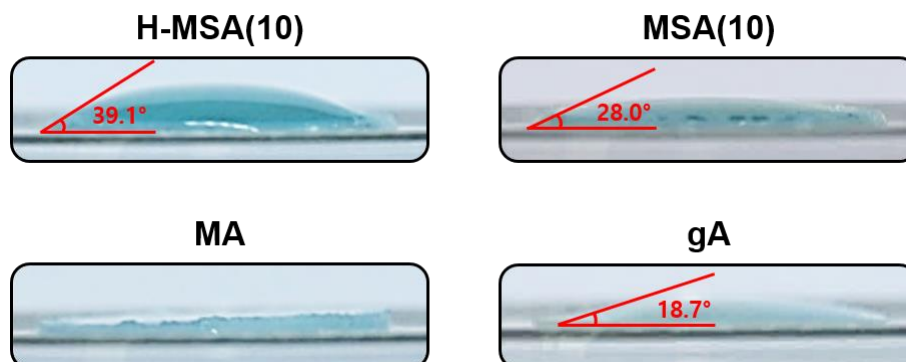

**Figure S2.** Wettability experiments with H-MSA(10), MSA(10), MA, and gA. The measured contact angle is added into each panel except MA showing the spreading behavior.

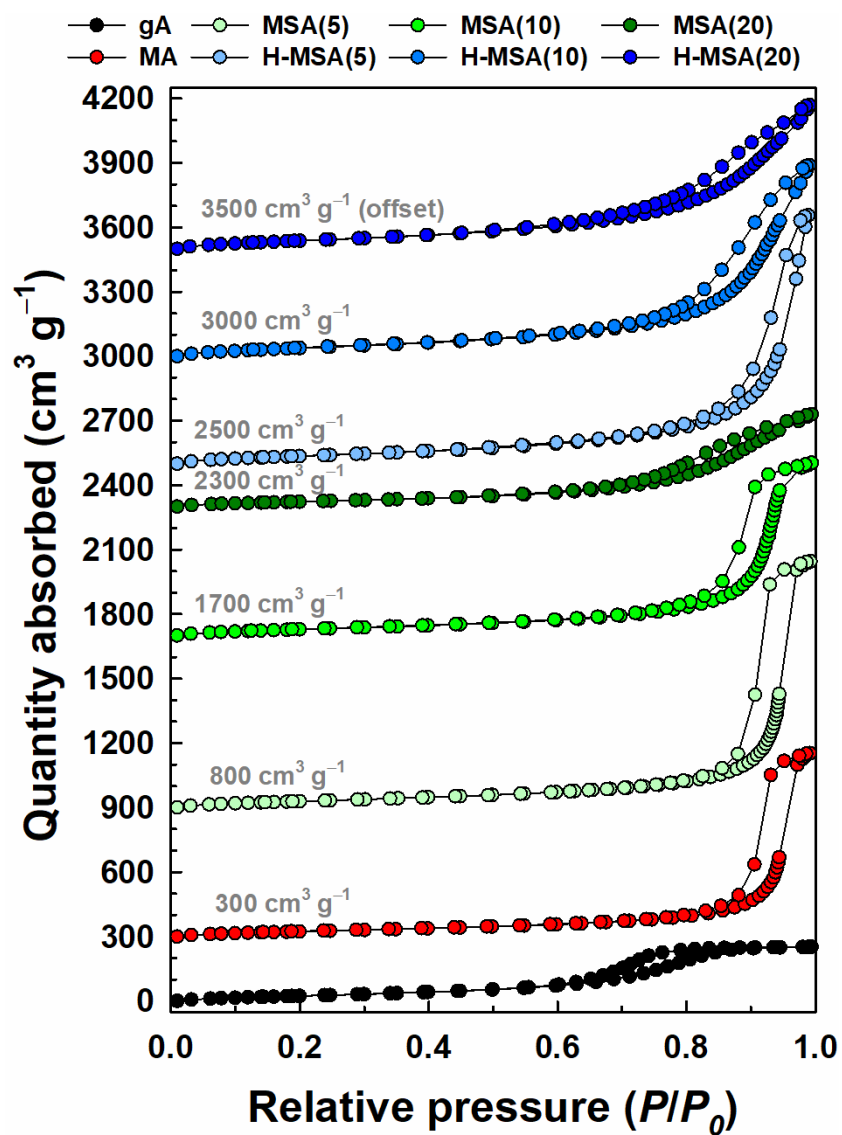

**Figure S3.**  $\text{N}_2$  adsorption-desorption isotherms of the prepared support materials.

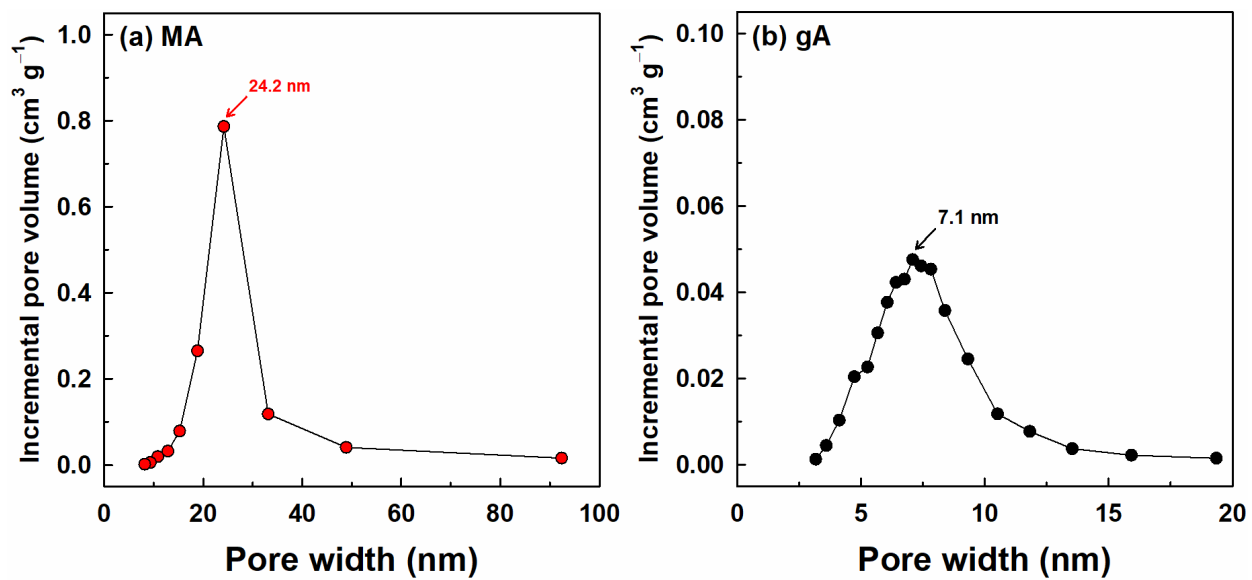

**Figure S4.** Pore size distribution curves of the prepared support materials: (a) MA and (b) gA.

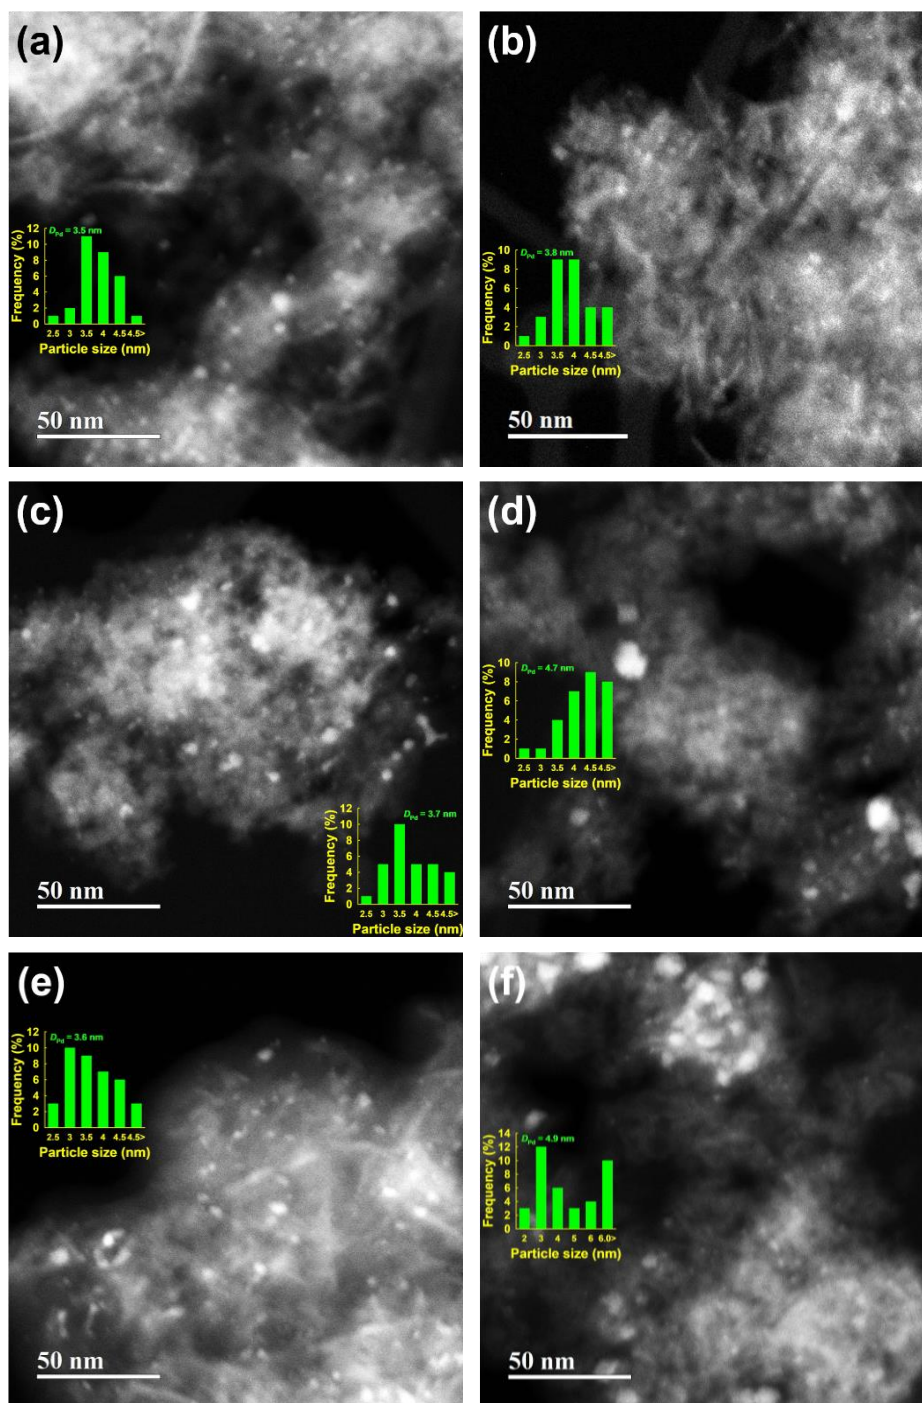

**Figure S5.** TEM images of (a) the fresh PdO<sub>x</sub>/H-MSA(10), (b) spent PdO<sub>x</sub>/H-MSA(10), (c) fresh PdO<sub>x</sub>/MSA(10), (d) spent PdO<sub>x</sub>/MSA(10), (e) fresh PdO<sub>x</sub>/MA, and (f) spent PdO<sub>x</sub>/MA. The spent samples were obtained after isothermal test at 500 °C for 24 h. Insets represent the particle size distribution of PdO<sub>x</sub> determined by statistical analysis of ca. 30–40 white particles.

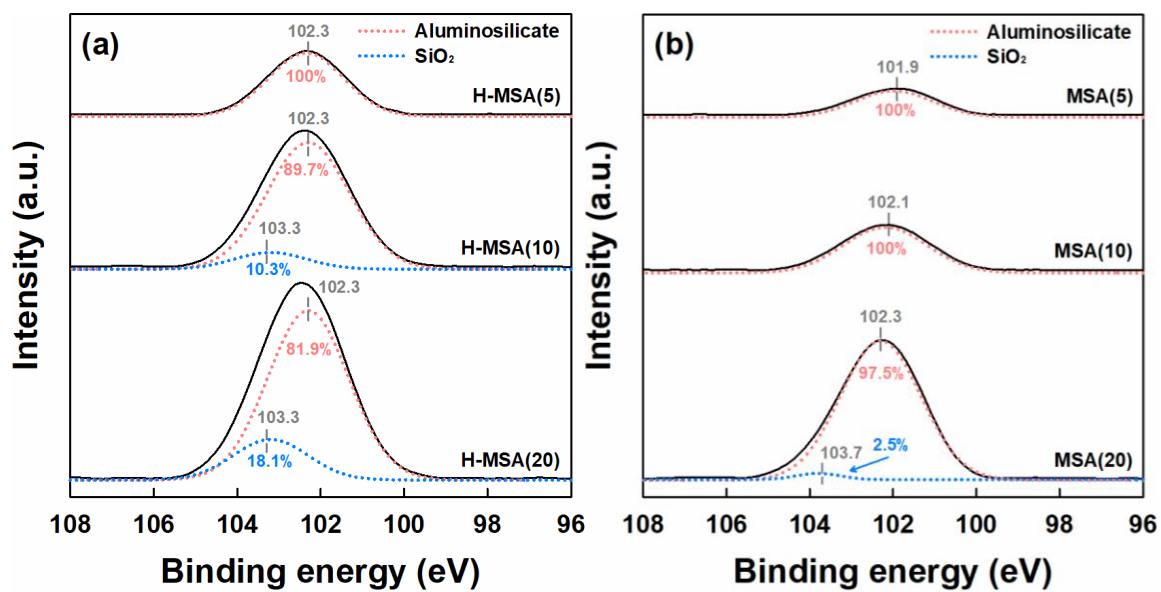

**Figure S6.** XPS results of (a) H-MSA( $x$ ) and (b) MSA( $x$ ) in the binding energy region of Si 2p.

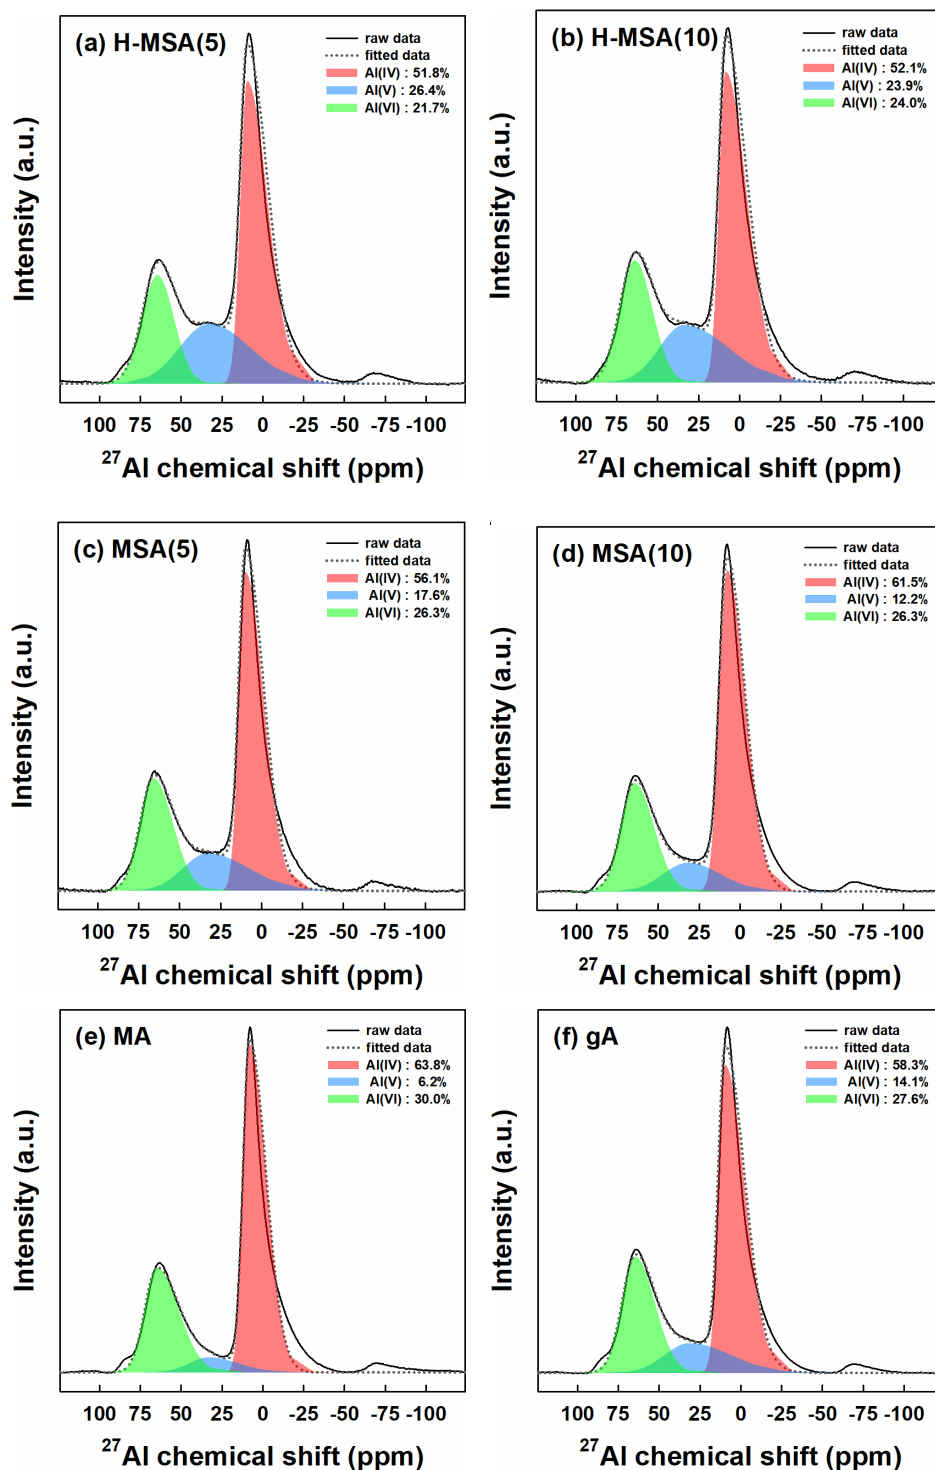

**Figure S7.**  $^{27}\text{Al}$  MAS NMR spectra of all supports: (a) H-MSA(5), (b) H-MSA(10), (c) MSA(5), (d) MSA(10), (e) MA and (f) gA (red: octahedral  $\text{Al}^{\text{VI}}$ ; blue: penta-coordinated  $\text{Al}^{\text{V}}$ ; green: tetrahedral  $\text{Al}^{\text{IV}}$ ). The fitting results are marked by gray dots.

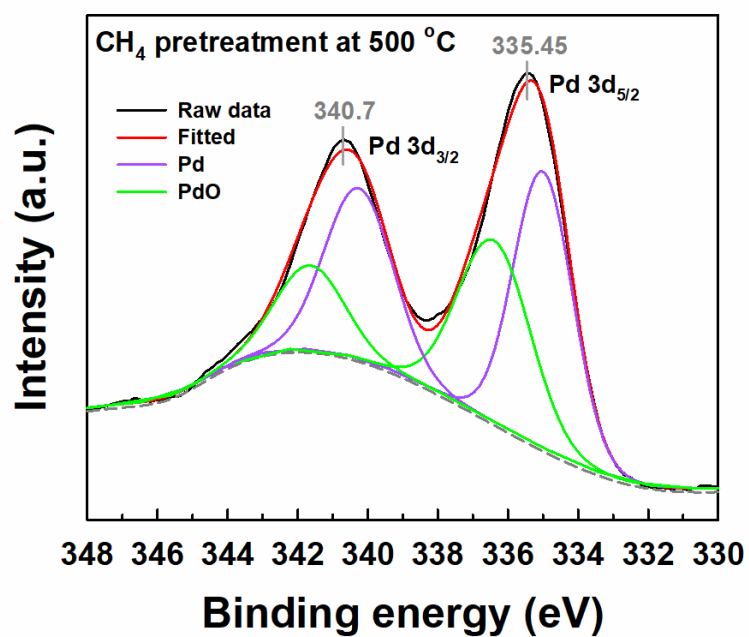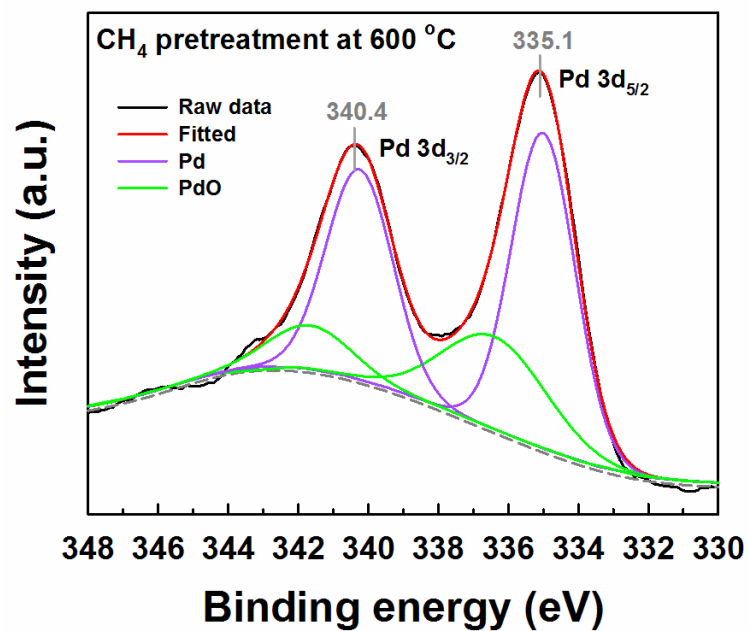

**Figure S8.** XPS spectra of the catalyst samples pretreated with 20% CH<sub>4</sub> in N<sub>2</sub> at 500 and 600 °C.

**Table S1.** Isothermal methane combustion performance of the reported Pd catalysts and PdO<sub>x</sub>/H-MSA(5) in this work

| Catalyst                        | Feed composition |                |                  |                | GHSV<br>(cm <sup>3</sup> g <sup>-1</sup> h <sup>-1</sup> ) | Temp.<br>(°C) | CH <sub>4</sub> conv.<br>(%) | Ref.      |
|---------------------------------|------------------|----------------|------------------|----------------|------------------------------------------------------------|---------------|------------------------------|-----------|
|                                 | CH <sub>4</sub>  | O <sub>2</sub> | H <sub>2</sub> O | Balance        |                                                            |               |                              |           |
|                                 | (%)              | (%)            | (%)              | gas            |                                                            |               |                              |           |
| <b>Pd/κ-CZ</b>                  | 1                | 20             | 5                | N <sub>2</sub> | 30,000                                                     | 330           | 60                           | [1]       |
| <b>Pd2Ce</b>                    | 0.07             | 8.5            | 10               | N <sub>2</sub> | 36,000                                                     | 425           | 65                           | [2]       |
| <b>Al-Pd/MA-A72</b>             | 0.5              | 10             | 10               | N <sub>2</sub> | 40,000                                                     | 500           | 95                           | [3]       |
| <b>0.6Pd@S-1</b>                | 1                | 16             | 4.5              | N <sub>2</sub> | 50,000                                                     | 410           | 95                           | [4]       |
| <b>Pd/5CZA-5M</b>               | 1                | 5              | 5                | N <sub>2</sub> | 50,000                                                     | 360           | 50                           | [5]       |
| <b>Pd/Na-MOR-Dno</b>            | 1                | 4              | 5                | N <sub>2</sub> | 70,000                                                     | 410           | 92                           | [6]       |
| <b>1.1Pd-SSZ-13(16)</b>         | 0.15             | 5              | 10               | He             | 100,000                                                    | 400           | 99                           | [7]       |
| <b>Pd/TS-1</b>                  | 0.7              | -              | 3–4              | air            | 100,000                                                    | 400           | 92                           | [8]       |
| <b>PdCe</b>                     | 0.5              | 2              | 10               | He             | 180,000                                                    | 450           | 55                           | [9]       |
| <b>PdCe SCS</b>                 | 0.5              | 2              | 10               | He             | 200,000                                                    | 450           | 50                           | [10]      |
| <b>Pd/ZrO<sub>2</sub>(85)</b>   | 0.1              | 3.15           | 10               | N <sub>2</sub> | 240,000                                                    | 500           | 95                           | [11]      |
| <b>Pd/ZrO<sub>2</sub>(700)</b>  | 0.1              | 3.15           | 10               | N <sub>2</sub> | 240,000                                                    | 450           | 97.5                         | [12]      |
| <b>PdO<sub>x</sub>/H-MSA(5)</b> | 0.4              | 12             | 5                | N <sub>2</sub> | 200,000                                                    | 500           | 98                           | This work |

## References

1. Ding, Y.; Wu, Q.; Lin, B.; Guo, Y.; Guo, Y.; Wang, Y.; Wang, L.; Zhan, W. Superior catalytic activity of a Pd catalyst in methane combustion by fine-tuning the phase of ceria-zirconia support. *Appl. Catal. B* **2020**, *266*, 118631–118641.
2. AlMohamadi, H.; Smith, K.J. The impact of CeO<sub>2</sub> Loading on the activity and stability of PdO/ $\gamma$ -AlOOH/ $\gamma$ -Al<sub>2</sub>O<sub>3</sub> monolith catalysts for CH<sub>4</sub> oxidation. *Catalysts* **2019**, *9*, 557–571
3. Yang, J.; Peng, M.; Ren, G.; Qi, H.; Zhou, X.; Xu, J.; Deng, F.; Chen, Z.; Zhang, J.; Liu, K.; Pan, X.; Liu, W.; Su, Y.; Li, W.; Qiao, B.; Ma, D.; Zhang, T. A hydrothermally stable irreducible oxide-modified Pd/MgAl<sub>2</sub>O<sub>4</sub> catalyst for methane combustion. *Angew. Chem.* **2020**, *59*, 18522–18526
4. Wang, W.; Zhou, W.; Li, W.; Xiong, X.; Wang, Y.; Cheng, K.; Kang, J.; Zhang, Q.; Wang, Y. In-situ confinement of ultrasmall palladium nanoparticles in silicalite-1 for methane combustion with excellent activity and hydrothermal stability. *Appl. Catal. B* **2020**, *276*, 119142–119150
5. Chen, Y.; Lin, J.; Chen, X.; Fan, S.; Zheng, Y. Engineering multicomponent metal-oxide units for efficient methane combustion over palladium-based catalysts. *Catal. Sci. Technol.* **2020**, *11*, 152–161
6. Petrov, A.W.; Ferri, D.; Kröcher, O.; van Bokhoven, J.A.; Design of stable palladium-based zeolite catalyst for complete methane oxidation by postsynthesis zeolite modification. *ACS Catal.* **2019**, *9*, 2303–2312
7. Lim, J.B.; Jo, D.; Hong, S.B. Palladium-exchanged small-pore zeolites with different cage systems as methane combustion catalysts. *Appl. Catal. B* **2017**, *219*, 155–162
8. Hosseiniamoli, H.; Setiawan, A.; Adesina, A.A.; Kennedy, E.M.; Stockenhuber, M. The stability of Pd/TS-1 and Pd/silicalite-1 for catalytic oxidation of methane – understanding the role of titanium. *Catal. Sci. Technol.* **2020**, *10*, 1193–1204
9. Toso, A.; Colussi, S.; Llorca, J.; Trovarelli, A. The dynamics of PdO-Pd phase transformation in the presence of water over Si-doped Pd/CeO<sub>2</sub> methane oxidation catalysts. *Appl. Catal. A* **2019**, *574*, 79–86
10. Toso, A.; Colussi, S.; Padigapaty, S.; de Leitenburg, C.; Trovarelli, A. High stability and activity of solution combustion synthesized Pd-based catalysts for methane combustion in presence of water. *Appl. Catal. A* **2018**, *230*, 237–245
11. Hong, E.; Kim, C.; Lim, D.-H.; Cho, H.-J.; Shin, C.-H. Catalytic methane combustion over Pd/ZrO<sub>2</sub> catalysts: Effect of crystalline structure and textural properties. *Appl. Catal. B* **2018**, *232*, 544–552
12. Kim, C.; Hong, E.; Shin, C.-H. Improvement of methane combustion activity for Pd/ZrO<sub>2</sub> catalyst by simple reduction/reoxidation treatment. *Catalysts* **2019**, *9*, 838–852
